# Supplementary material for: Na ion-exchanged zirconium phosphate crystal with high calcium ion selectivity
Source: Royal Society of Chemistry journal article supplement (doi:10.1039/d4dt01289e), 2024-01-01
Supplement: d4dt01289e1.pdf [file d4dt01289e1.pdf]

## Supporting Information for

Na Ion-Exchanged Zirconium Phosphate Crystal with High Calcium Ion Selectivity

*Fumitaka Hayashi,<sup>†\*</sup> Yuka Shirasu,<sup>†</sup> Kazunori Fujisawa,<sup>¶</sup> Mongkol Tipplook,<sup>¶</sup>*

*Tetsuya Yamada,<sup>†¶</sup> Katsuya Teshima<sup>†¶\*</sup>*

<sup>†</sup>Department of Materials Chemistry, Faculty of Engineering, Shinshu University, 4-17-1

Wakasato, Nagano 380-8553, Japan

<sup>¶</sup>Research Initiative for Supra-Materials (RISM), Shinshu University, 4-17-1 Wakasato, Nagano

380-8553, Japan

\*Email addresses: [teshima@shinshu-u.ac.jp](mailto:teshima@shinshu-u.ac.jp); [fhayash@shinshu-u.ac.jp](mailto:fhayash@shinshu-u.ac.jp)

### Materials and Methods

#### Growth of (Na,H)-ZrP crystals

(Na,H)-ZrP is synthesized by using  $\alpha$ -ZrP (manufactured by Toa Gosei) and commercially available reagents:  $\text{NaH}_2\text{PO}_4 \cdot 2\text{H}_2\text{O}$  (reagent grade, Wako Pure Chemical Industries), NaF (special grade, Wako Pure Chemical Industries), and  $\text{H}_3\text{PO}_4$  (reagent grade, Wako Pure Chemical Industries). Typically, the components were weighed in a atomic/molar ratio of Zr :  $\text{PO}_4$  : F = 1 : 4.5 : 0.3 to achieve a total mass of approximately 3.5 g. Subsequently, the mixture was ground in an agate mortar for 15 minutes and then transferred to a Teflon container with a volume of about 100 mL. A solution of  $\text{H}_3\text{PO}_4$  (30 mL) was added to the Teflon container, and the pH was adjusted to approximately 1-4. The hydrothermal synthesis was conducted under the conditions of holding temperatures at 150, 190, 220, and 250 °C, and holding times of 24 hours. After heating, the mixture was cooled to room temperature, separated by suction filtration, and dried at 50 °C.

Transformation of (Na,H)-ZrP into  $\gamma$ -ZrP is achieved through the immersion in 6 M HCl aqueous solution at room temperature for 24 hours.

**Characterization.** X-ray diffraction (XRD) patterns were collected using a MiniflexII diffractometer (Rigaku, Japan) and SmartLab (Rigaku, Japan) with monochromated Cu  $K_{\alpha}$  radiation ( $\lambda = 0.15418$  nm). Field-emission scanning electron microscopy (FE-SEM) images and energy dispersive X-ray (EDX) spectrometry data were obtained using a JSM-7600F instrument (JEOL, Japan). Thermogravimetry–differential thermal analysis (TG-DTA, Thermo Plus EVOII TG8120, Rigaku, Japan) was used to analyze the water content in the samples at a heating rate of  $10$  °C  $\text{min}^{-1}$  in an air flow. Bright-field TEM images and SAED patterns were obtained using an 80-kV electron microscope (JEM-2100F, JEOL) equipped with a double-aberration corrector (CESCOR/CETCOR, CEOS).

### **Adsorption Experiments.**

Reagent were purchased from FUJIFILM Wako Pure Chemical Industries unless otherwise stated. The ion exchange reactions are performed through the immersion of the prepared ZrP samples in 0.25-8 mM alkaline earth metal chloride  $\text{MCl}_2$  solution ( $\text{M} = \text{Mg}, \text{Ca}, \text{Sr}, \text{Ba}$ ) at 25, 40, and 70 °C for 10-5000 min, and the final pH of the solution was 3-6. For example, ZrP samples (70 mg) was immersed in 70 mL of an aqueous alkaline earth metal chloride solution.

For the Kielland plot analysis, 70 mg specimens were equilibrated for 2 h in 70 mL of a binary chloride solution ( $\text{MCl}_2\text{-NaCl/HCl}$ ,  $\text{M} = \text{Mg}, \text{Ca}, \text{Sr}, \text{Ba}$ ) at various ratios of the two salts to determine the thermodynamic parameters at a total molarity of 8 mM at 70 °C for 2 h. The adsorption experiments were conducted at least twice under the same adsorption conditions.

The distribution coefficient  $K_d$  was used to evaluate the selectivity of (Na,H)-ZrP toward various cations (Eq. 1):

$$K_d = \frac{(C_0 - C_e)V}{C_e m}, \quad (1)$$

where  $C_0$  and  $C_e$  are the initial and equilibrium concentrations ( $\text{mmol}\cdot\text{L}^{-1}$ ) of  $\text{Ca}^{2+}$ ,  $V$  is the volume ( $\text{cm}^3$ ) of the testing solution, and  $m$  is the amount of ion-exchanger (g).

The ion exchange reaction of  $\text{Na}^+/\text{H}^+$  in (Na,H)-ZrP and  $\gamma$ -ZrP with  $\text{Ca}^{2+}$  can be represented by Eqs. 2 and 3 (the bar refers to the solid phase):

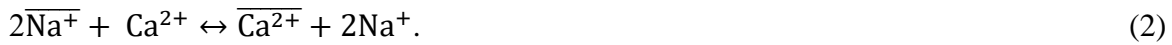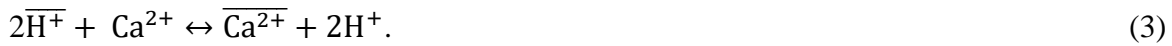

The thermodynamic equilibrium constant  $K$  of the ion exchange reaction (presented in Eq. 2 or 3) can be defined by Eq. 4 in the case of  $\text{Na}^+$  exchange reaction:

$$K_{\text{Na} \rightarrow \text{Ca}} = \frac{m_{\text{Na}^{2+}} \cdot \overline{X}_{\text{Ca}} \cdot \gamma_{\text{Na}^{2+}} \cdot \overline{f}_{\text{Ca}}}{m_{\text{Ca}^{2+}} \cdot \overline{X}_{\text{Na}^{2+}} \cdot \gamma_{\text{Ca}^{2+}} \cdot \overline{f}_{\text{Na}^{2+}}} = K_{\text{Na}}^{\text{Ca}} \frac{\overline{f}_{\text{Ca}}}{\overline{f}_{\text{Na}^{2+}}} \quad (4)$$

where  $K_{\text{Na}}^{\text{Ca}}$  is defined as the corrected selectivity coefficient,  $m_{\text{Na}}$  and  $m_{\text{Ca}}$  are the molalities of the cations in solution,  $\overline{X}_{\text{Na}}$  and  $\overline{X}_{\text{Ca}}$  are the equivalent fractions of  $\text{Na}^+$  and  $\text{Ca}^{2+}$  in the solid phase,  $\gamma_{\text{Na}}$  and  $\gamma_{\text{Ca}}$  are the ionic activity coefficients of  $\text{Na}^+$  and  $\text{Ca}^{2+}$  in the aqueous phase, and  $\overline{f}_{\text{Na}}$  and  $\overline{f}_{\text{Ca}}$  are the ionic activity coefficients of  $\text{Na}^+$  and  $\text{Ca}^{2+}$  in the solid phase. The value of the ionic activity coefficient ratio  $\gamma_{\text{Na}}/\gamma_{\text{Ca}}$  in solution is assumed to be unity owing to the dilute conditions. The thermodynamic equilibrium constant can be evaluated by Eq. 5 using a simplified form of the Gaines-Thomas equation,<sup>S1</sup> with the assumption that the change in the water activity in the solid and aqueous phase is negligible.

$$\ln K = \int_0^1 \ln K_{\text{Na}}^{\text{Ca}} d\overline{X}_{\text{Ca}}. \quad (5)$$

The Kielland plot<sup>S2</sup> corresponds to the graph of  $\ln K_{Na}^{Ca}$  versus  $\bar{X}_{Ca}$ , is represented by Eq. 6:

$$\ln K_{Na}^{Ca} = 4.606 C \bar{X}_{Ca} + (\ln K_{Na}^{Ca})_{\bar{X} \rightarrow 0}, \quad (6)$$

where  $C$  is the Kielland coefficient and  $(\ln K_{Na}^{Ca})_{\bar{X} \rightarrow 0}$  is the value of  $\ln K_{Na}^{Ca}$  when  $\bar{X}_{Ca}$  is nearly zero.

The standard free energy change for the  $Ca^{2+}$  exchange reaction is evaluated by Eq. 7 using the

$(\ln K_{Na}^{Ca})_{\bar{X} \rightarrow 0}$  value:

$$\Delta G^0 = -RT \ln K, \quad (7)$$

where  $R$  and  $T$  are the molar gas constant and temperature, respectively.

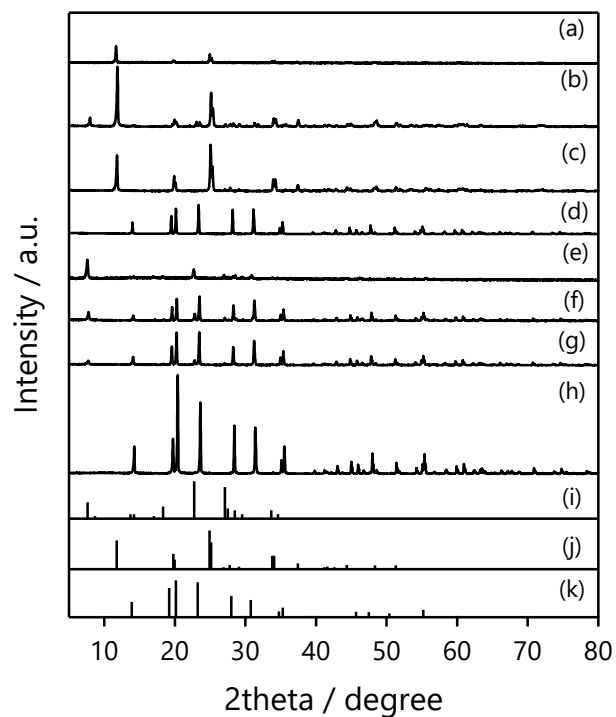

**Figure S1.** XRD patterns of hydrothermally grown (Na,H)-ZrP at (a) 150, (b) 190, (c) 220, and (d) 250 °C for pH = 1, and at (e) 150, (f) 190, (g) 220, and (h) 250 °C for pH = 3 together with those of references (i)  $\gamma$ -ZrP (PDF 00-048-0727), (j)  $\alpha$ -ZrP (PDF 00-033-1482) and (k)  $Zr_2H(PO_4)_3$  (PDF 00-038-0004). Condition: holding time, 24 h; atomic/molar ratio, Zr :  $PO_4$  : F = 1 : 4.5 : 0.3.

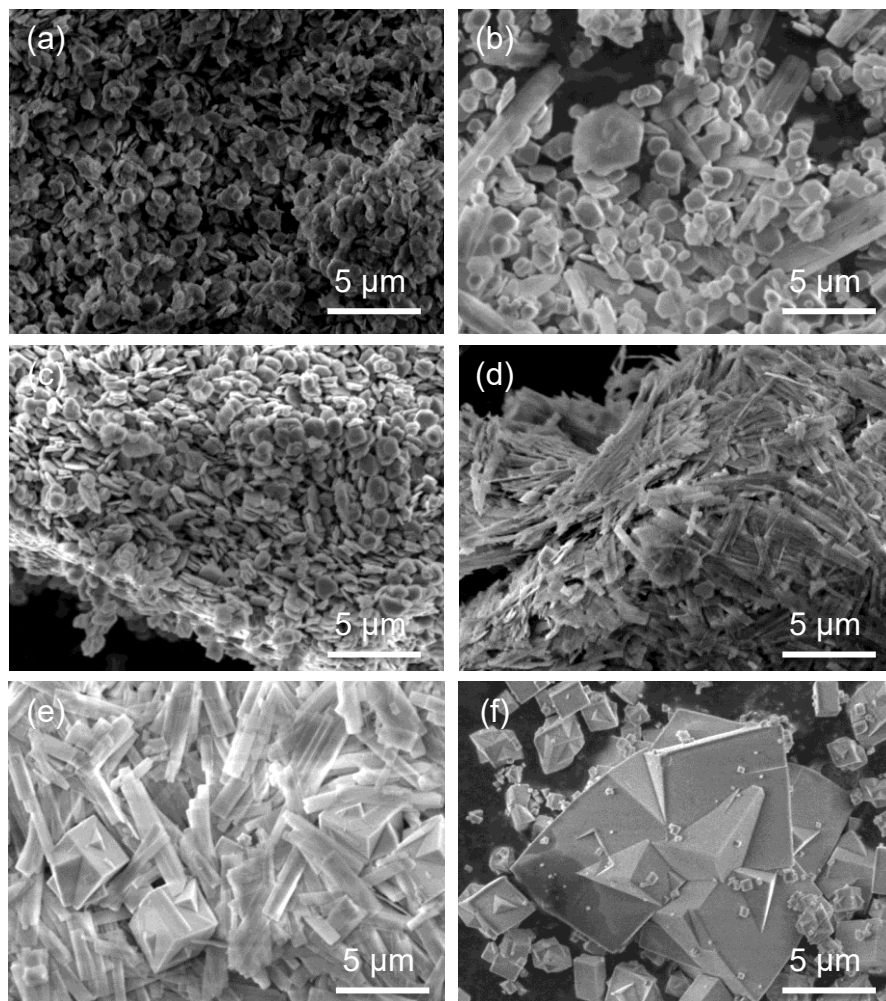

**Figure S2.** SEM images of hydrothermally grown (Na,H)-ZrP at (a) 150, (b) 190, and (c) 250 °C for pH = 1, and at (d) 150, (e) 190, and (f) 250 °C for pH = 3. Condition: holding time, 24 h; atomic/molar ratio, Zr : PO<sub>4</sub> : F = 1 : 4.5 : 0.3.

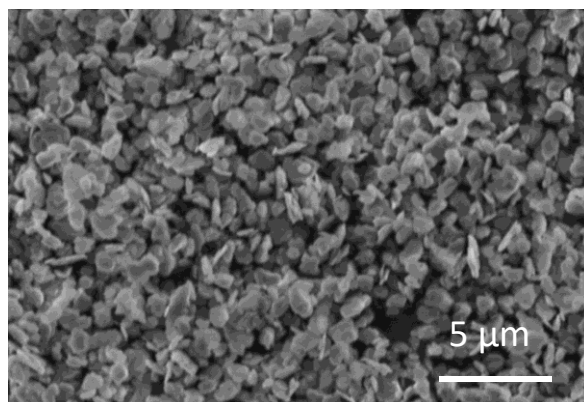

**Figure S3.** SEM image of  $\alpha$ -ZrP used as a seed crystal.

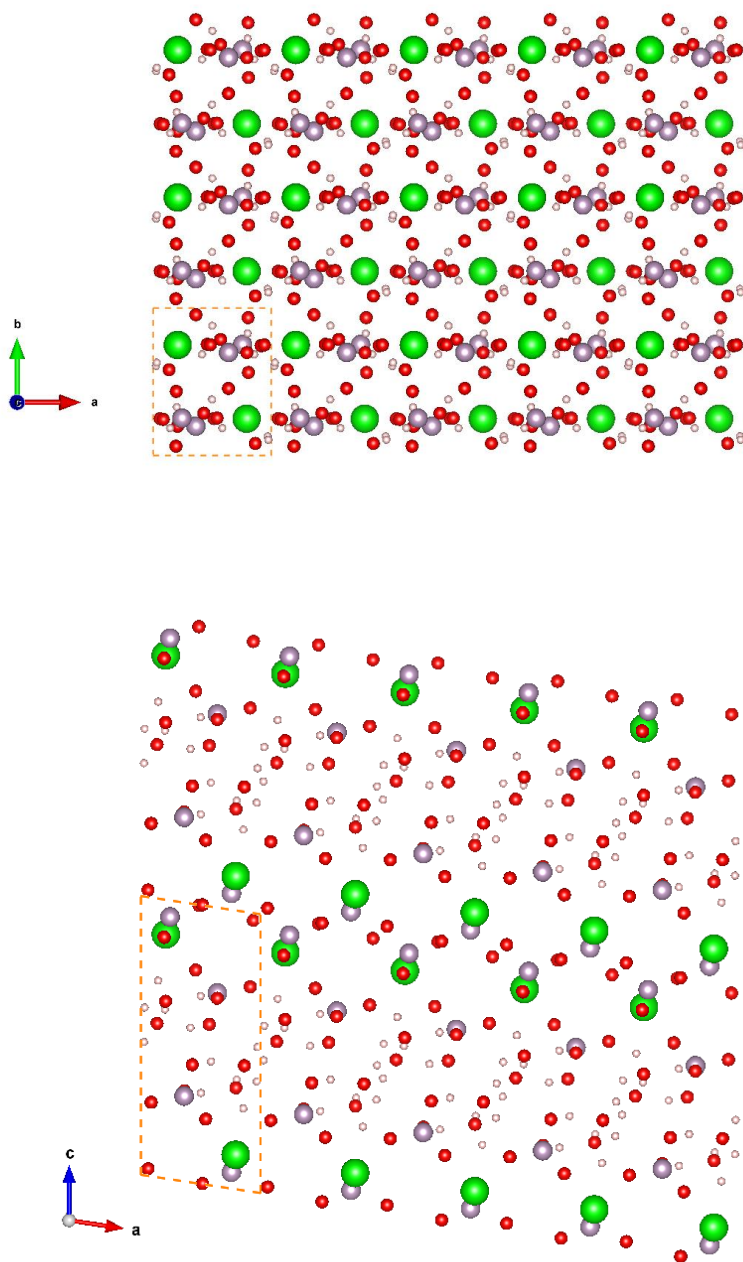

**Figure S4.** Crystal structures of  $\gamma$ -ZrP (ICSD (Inorganic Crystal Structure Database) collection code 79262). Color: green, Zr; gray, P; red, O; and white, H. Crystals structures are depicted using the VESTA program (K. Momma and F. Izumi, *J. Appl. Crystallogr.* **2011**, 44, 1272-1276).

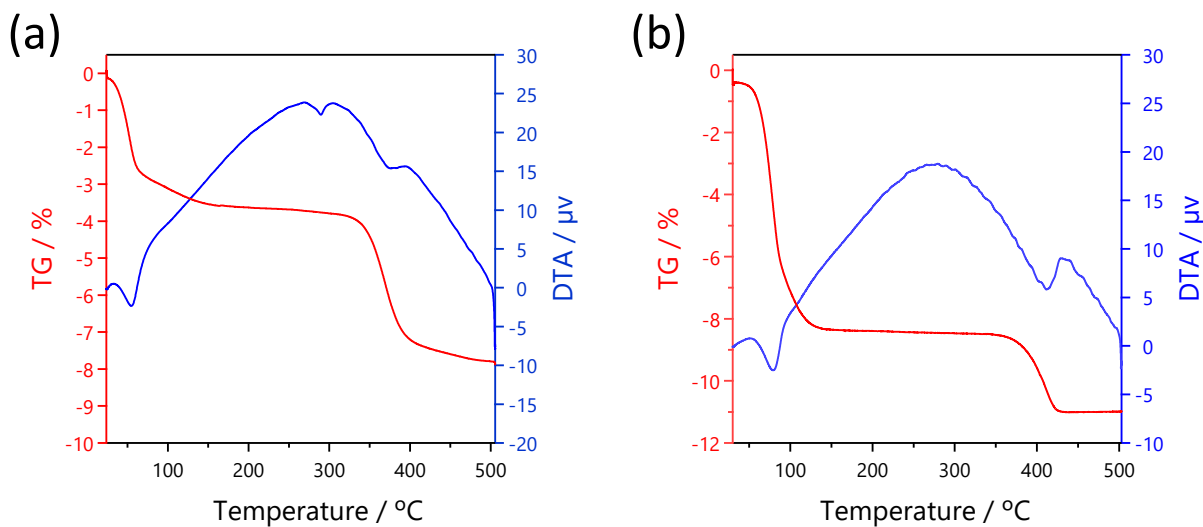

**Figure S5.** TG-DTA profiles of (a) (Na,H)-ZrP grown at 150 °C at pH = 3 and (b) corresponding  $\gamma$ -ZrP.

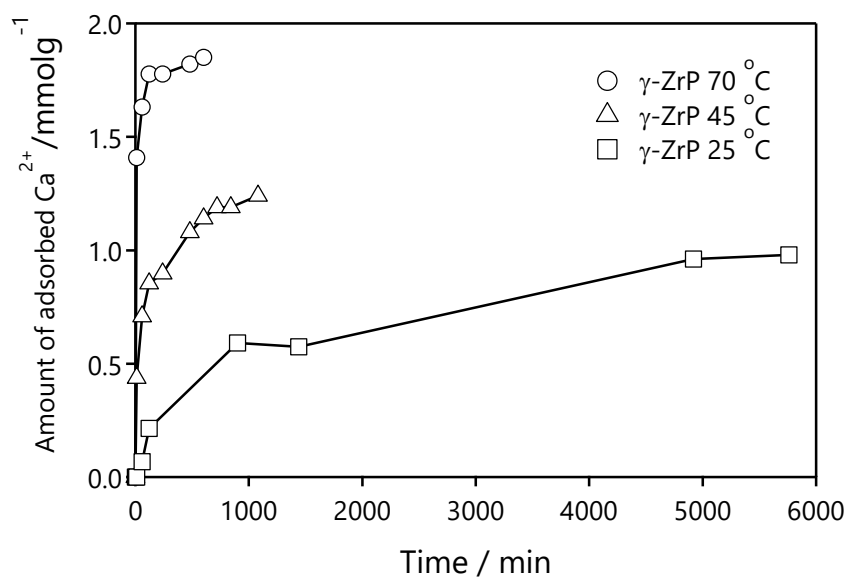

**Figure S6.** Kinetic curves for  $\text{Ca}^{2+}$  adsorption on  $\gamma$ -ZrP at  $\square$ , 25 °C;  $\triangle$ , 45 °C;  $\circ$ ; 70 °C. Condition: Initial concentration, 4 mM; solid to liquid ratio, 1 g L<sup>-1</sup>.



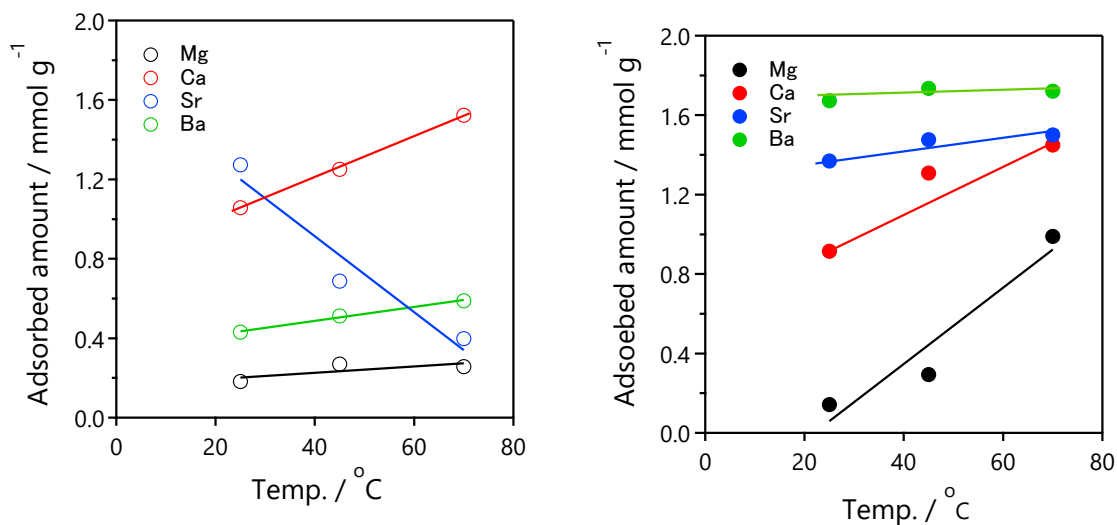

**Figure S7.** Temperature dependence of respective alkaline earth ion adsorption on (a) (Na,H)-ZrP and (b)  $\gamma$ -ZrP. Condition: Initial conc., 4 mM; solid to liquid ratio, 1 g L<sup>-1</sup>; time, 72 h for 25 °C, 8 h for 45 °C, and 2 h for 70 °C.

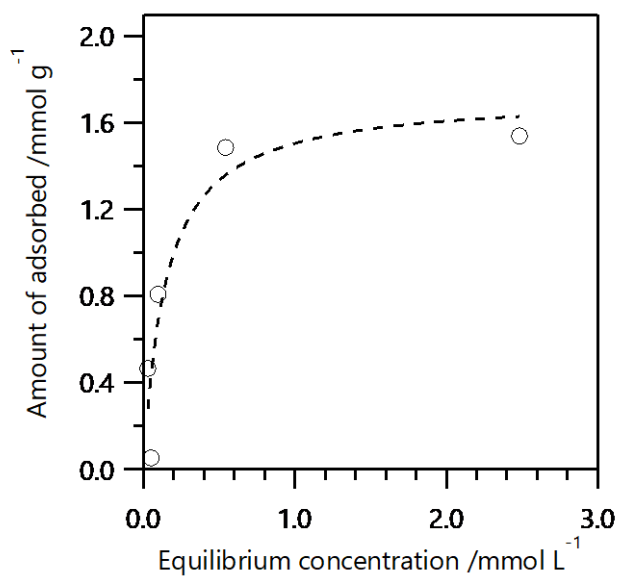

**Figure S8.** Ca<sup>2+</sup> adsorption isotherm on the (Na,H)-ZrP at 70 °C with Langmuir model fitting result (dashed black line). Condition: Initial conc., 0-4 mM; solid to liquid ratio, 1 g L<sup>-1</sup>.

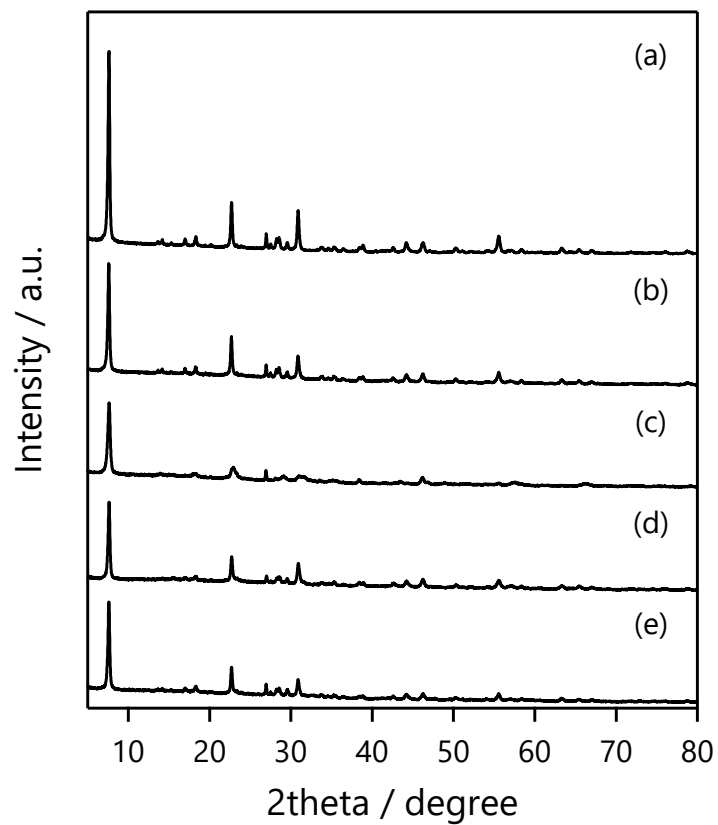

**Figure S9.** XRD patterns of (a) parent (Na,H)-ZrP and that after the (b) Mg<sup>2+</sup>, (c) Ca<sup>2+</sup>, (d) Sr<sup>2+</sup>, and (e) Ba<sup>2+</sup> exchange reactions.

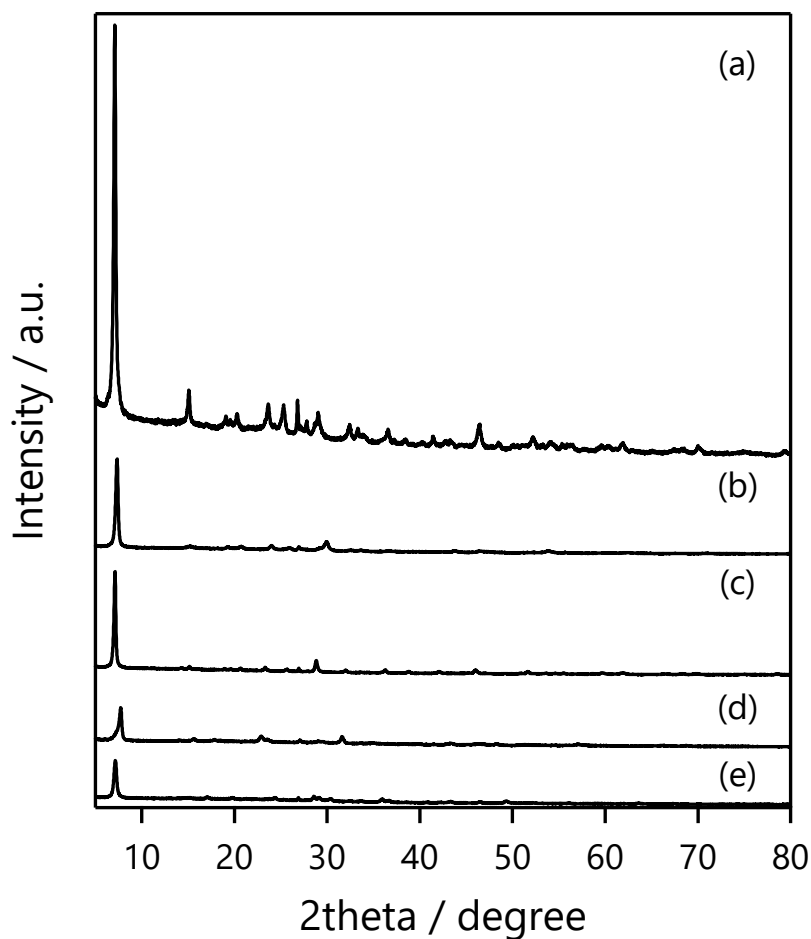

**Figure S10.** XRD patterns of (a) parent  $\gamma$ -ZrP and that after the (b)  $Mg^{2+}$ , (c)  $Ca^{2+}$  (d)  $Sr^{2+}$ , and (e)  $Ba^{2+}$  exchange reactions.

## REFERENCES

- S1) Gaines, G. L. Jr.; Thomas, H. C. Adsorption Studies on Clay Minerals. II. A Formulation of the Thermodynamics of Exchange Adsorption. *J. Chem. Phys.* **1953**, 21, 714–718.
- S2) Kielland, J. Thermodynamics of Base-Exchange Equilibria of Some Different Kinds of Clays. *J. Soc. Chem. Ind. (London)* **1935**, 54, 232–234.
